# Supplementary material
Source: publisher figshare collection journal article supplement (https://karger.figshare.com/articles/dataset/_/11416899)

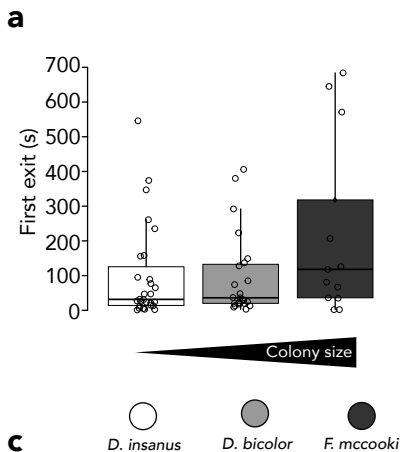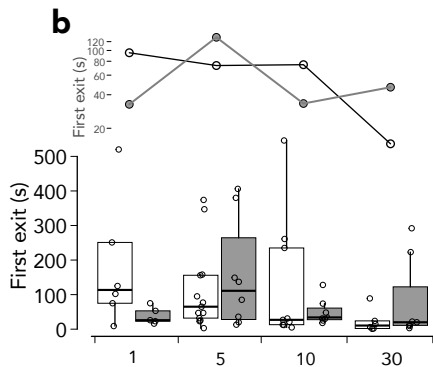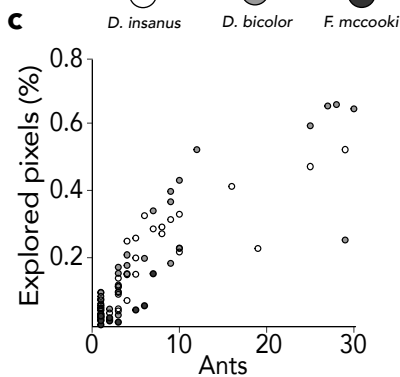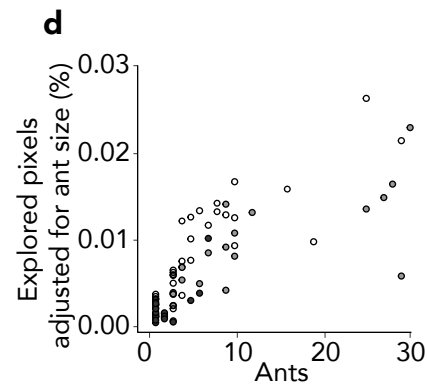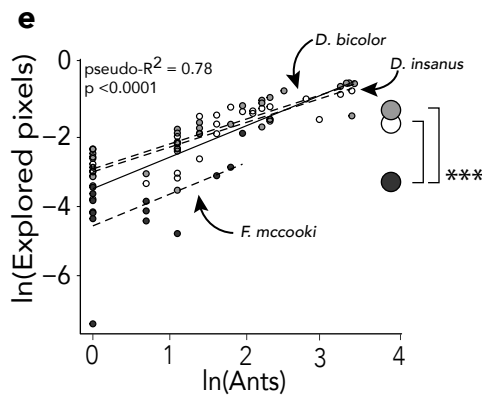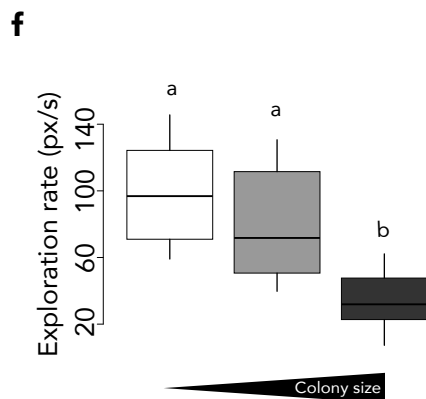

Supplement: Supplementary file 1 [file 1]

Scaled brain volume (mm<sup>3</sup>/mg)

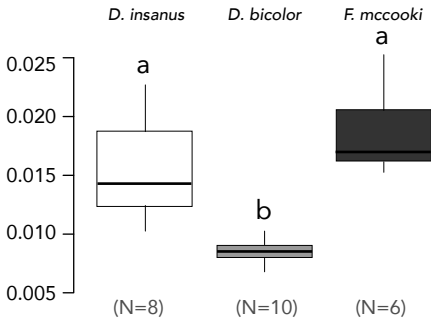

Colony size

Supplement: Supplementary file 2 [file 1]

a

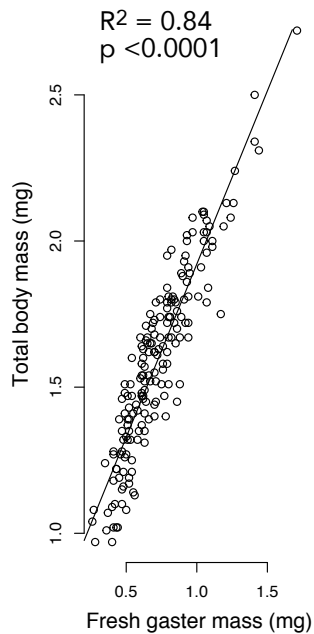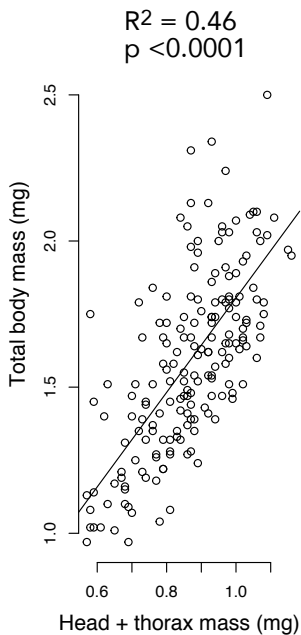

b

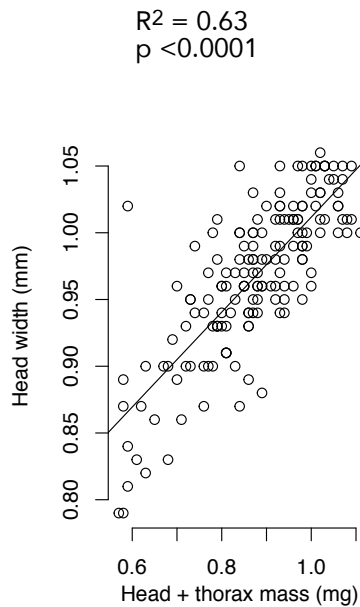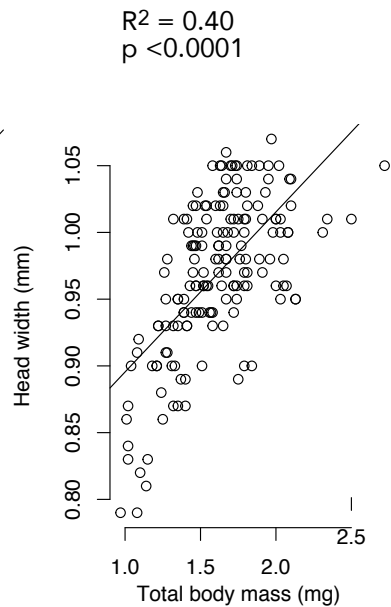

Supplement: Supplementary file 3 [file 1]
